# Supplementary material for: Construction of a multi-interfacial-electron transfer scheme for efficient CO2 photoreduction: a case study using CdIn2S4 micro-flower spheres modified with Au nanoparticles and reduced graphene oxide
Source: Royal Society of Chemistry journal article supplement (doi:10.1039/d0ta06602h), 2020-01-01
Supplement: d0ta06602h1.pdf [file d0ta06602h1.pdf]

## Supporting Information for

# **Construction of a multi-interfacial-electron transfer scheme for efficient CO<sub>2</sub> photoreduction: A case study using CdIn<sub>2</sub>S<sub>4</sub> micro flower spheres modified with Au nanoparticles and reduced graphene oxide**

**Xin Li<sup>a</sup>, Haopeng Jiang<sup>a</sup>, Changchang Ma<sup>a</sup>, Zhi Zhu<sup>a</sup>, Xianghai Song<sup>a</sup>, Xiuyan Li<sup>b</sup>, Huiqin Wang<sup>c</sup>, Pengwei Huo<sup>a\*</sup>, Xiaobo Chen<sup>d\*</sup>**

*<sup>a</sup>Institute of Green Chemistry and Chemical Technology, School of Chemistry & Chemical Engineering, Jiangsu University, Zhenjiang 212013, PR China*

*<sup>b</sup>Key Laboratory of Functional Materials Physics and Chemistry of the Ministry of Education, Jilin Normal University, Siping 136000, Jilin, China*

*<sup>c</sup>School of energy and power engineering, Jiangsu University, Zhenjiang 212013, PR China*

*<sup>d</sup>Department of Chemistry, University of Missouri-Kansas City, Kansas City, MO 64110, USA*

---

\* Corresponding author Tel: +86-511-88790885; Fax: +86-511-88790885; E-mail: huopw@mail.ujs.edu.cn

---

## 1. DFT analysis

The present first principle DFT calculations are performed with the projector augmented wave (PAW) method [1-2]. The exchange-functional is treated using the generalized gradient approximation (GGA) of Perdew-Burke-Ernzerhof (PBE) [3] functional. The cut-off energy of the plane-wave basis is set at 400 eV for optimize calculations of atoms and cell optimization. The vacuum spacing in a direction perpendicular to the plane of the catalyst is at least 10 Å. The Brillouin zone integration is performed using  $3 \times 3 \times 1$  Monkhorst-Pack k-point sampling for a primitive cell [4]. The self-consistent calculations apply a convergence energy threshold of  $10^{-5}$  eV. The equilibrium lattice constants are optimized with maximum stress on each atom within 0.05 eV/Å. The Hubbard U (DFT+U) corrections for 3d transition metal by setting according to the literature [5]. Finally, the adsorption eneries (Eads) can be calculated by:  $E_{ads} = E_{surface+A} - (E_{surface} + E_A)$ , where  $E_{surface+A}$  is the energy of systems with CO<sub>2</sub> molecular adsorbed,  $E_{surface}$  is the energy of surface sttructure, and the  $E_A$  is the energy of CO<sub>2</sub> molecular.

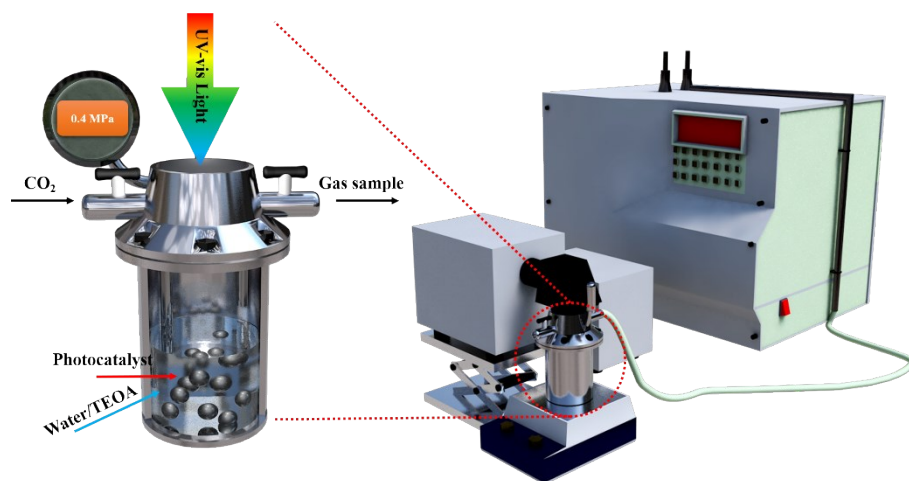

**Fig. S1.** The specific photocatalytic CO<sub>2</sub> reduction system.

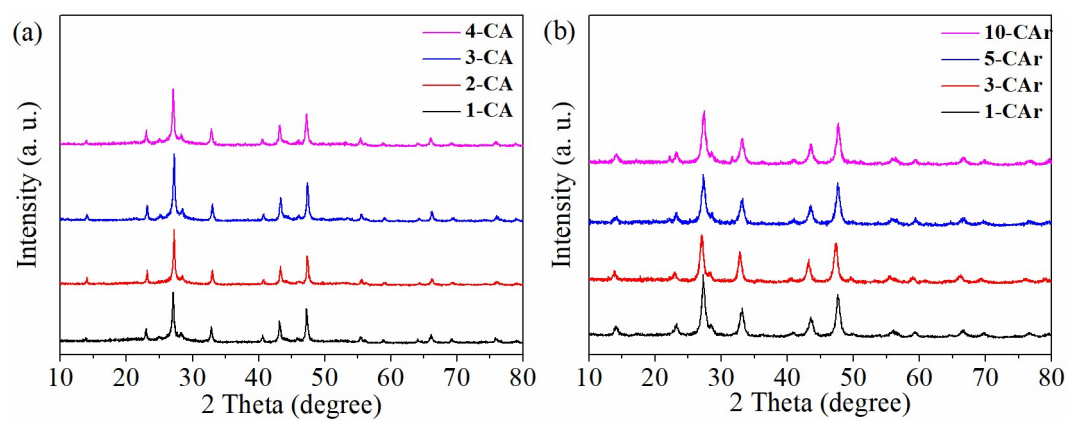

**Fig. S2.** XRD patterns of prepared binary and ternary composite photocatalysts.

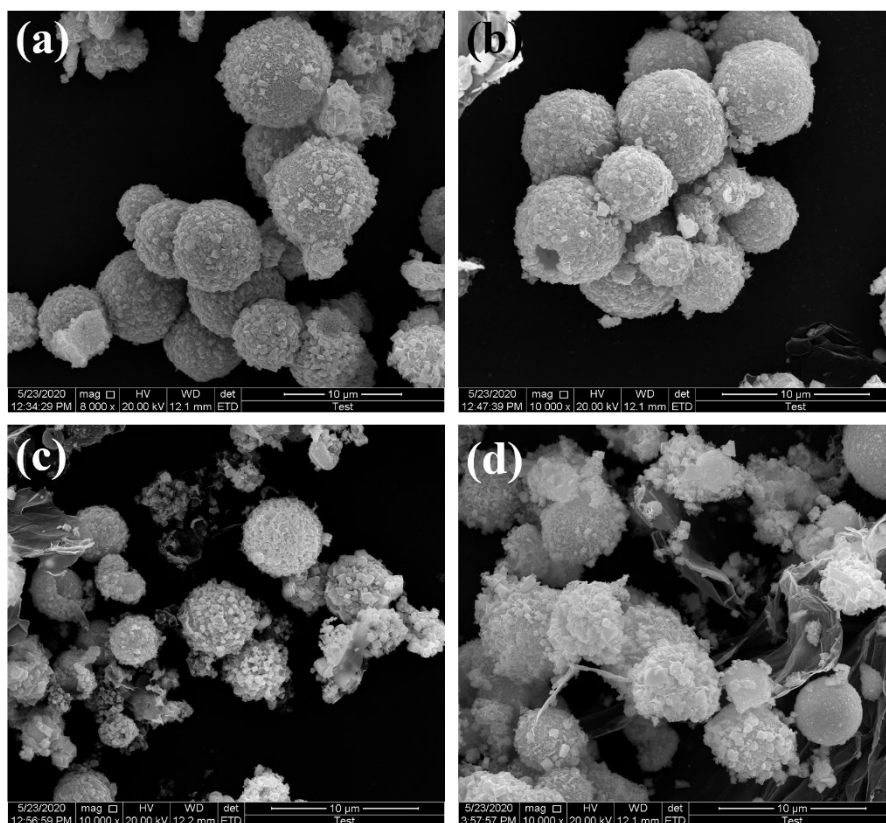

**Fig. S3.** SEM images of 1-CAR, 3-CAR, 5-CAR and 10-CAR.

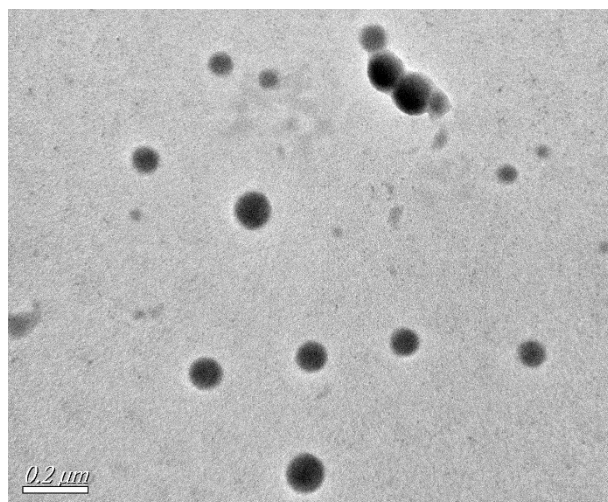

**Fig. S4.** TEM image of pure Au NPs.

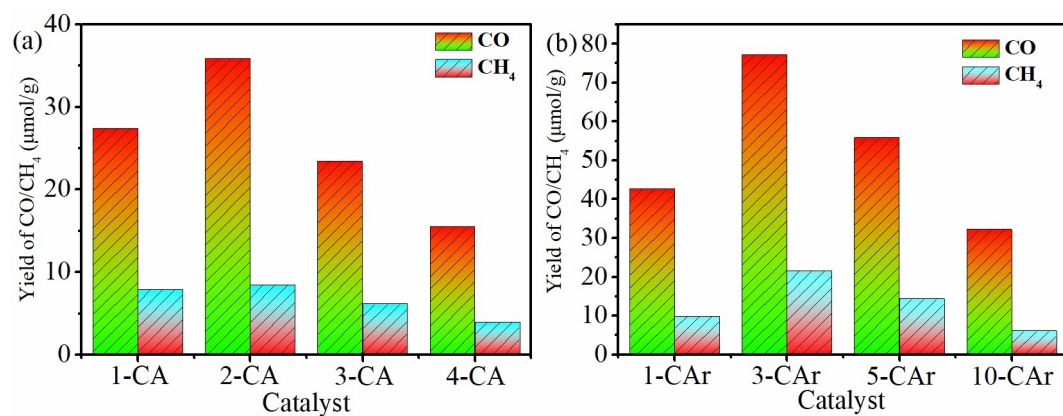

**Fig. S5.** The yields of CO and CH<sub>4</sub> in the photocatalytic CO<sub>2</sub> reduction process over all binary and ternary composite photocatalysts.

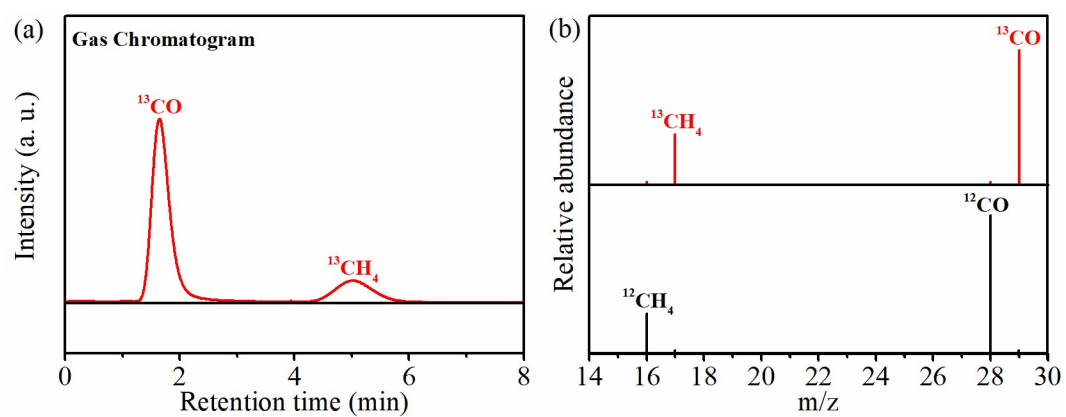

**Fig. S6.** Gas chromatography-mass spectrometry (GC-MS) results of CO and CH<sub>4</sub> produced by 3-CAr.



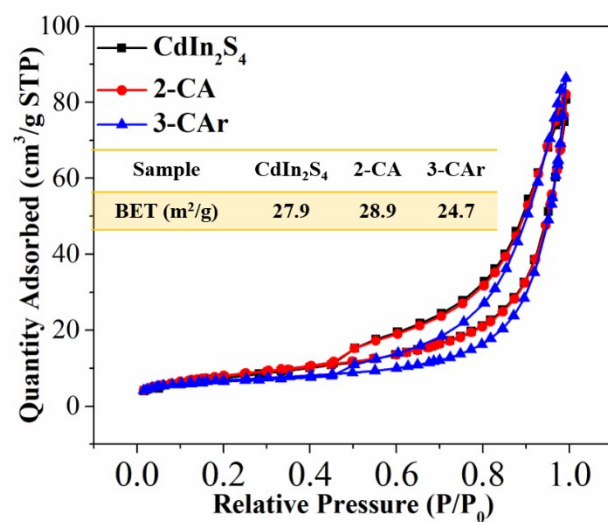

**Fig. S7.** N<sub>2</sub> adsorption-desorption isotherms of pure CdIn<sub>2</sub>S<sub>4</sub>, 2-CA and 3-CAr.

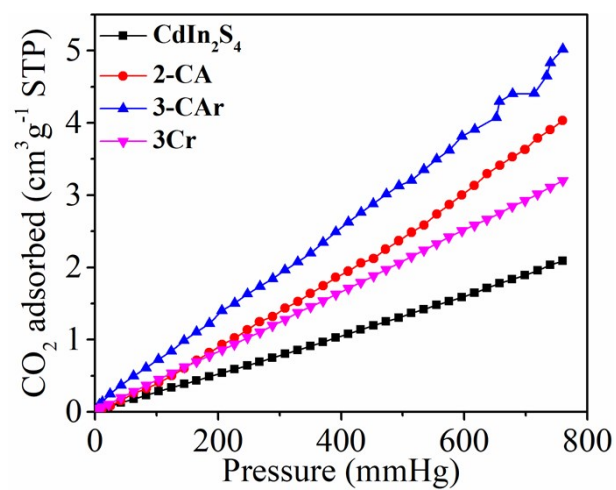

**Fig. S8.** CO<sub>2</sub> adsorption ability of pure CdIn<sub>2</sub>S<sub>4</sub>, 2-CA, 3-CAr and 3-Cr.

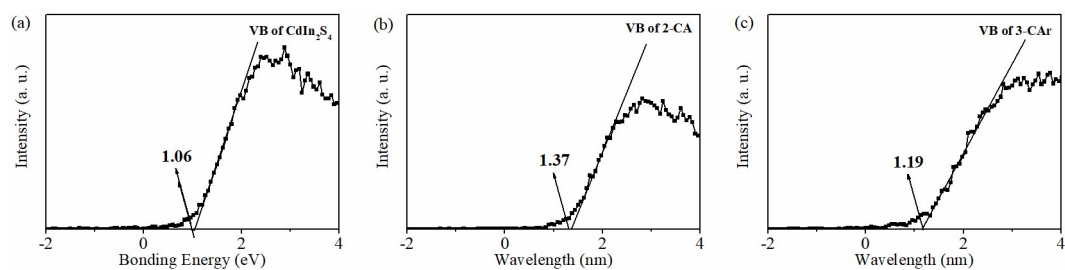

**Fig. S9.** The VB of pure CdIn<sub>2</sub>S<sub>4</sub>, 2-CA and 3-CAr.

---

## References

- [1] J. P. Perdew, K. Burke, M. Ernzerhof, Generalized Gradient Approximation Made Simple, Phys. Rev. Lett., 77 (1996) 3865.
- [2] G. Kresse, D. Joubert, From ultrasoft pseudopotentials to the projector augmented-wave method, Phys. Rev. B 59 (1999) 1758.
- [3] J.P. Perdew, K. Burke, M. Ernzerhof, Generalized gradient approximation made simple, Phys. Rev. Lett. 77 (1996) 3865.
- [4] D.J. Chadi, Special points for Brillouin-zone integrations, Phys. Rev. B 16 (1977) 5188-5192.
- [5] L. Gong, D. Zhang, C.Y. Lin, Y. Zhu, Y. Shen, J. Zhang, X. Han, L. Zhang, Z. Xia, Catalytic Mechanisms and Design Principles for Single-Atom Catalysts in Highly Efficient CO<sub>2</sub> Conversion, Advanced Energy Materials, 2019, 9, 1902625.
